# Supplementary material
Source: PubMed Central journal article supplement (PMC9622974)
Supplement: 13205_2022_3401_MOESM1_ESM.pdf [file 13205_2022_3401_MOESM1_ESM.pdf]

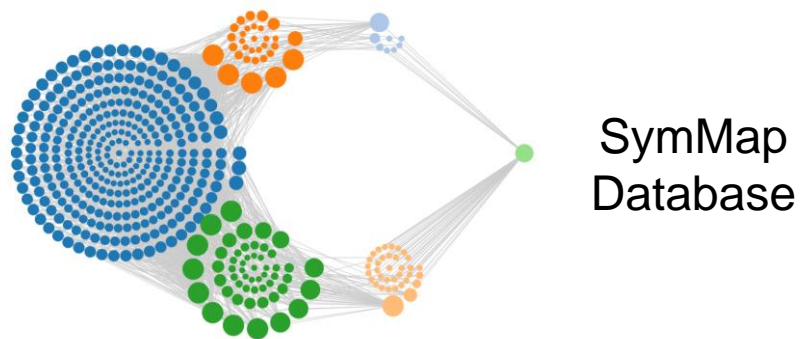

|    | ENGLISH NAME                       |
|----|------------------------------------|
| 1  | LEAF OF ARGY WORMWOOD              |
| 2  | MORINDAE OFFICILIS RADIX           |
| 3  | GINKGO SEED                        |
| 4  | SEMEN CLEOMIS                      |
| 5  | ALL - GRASS OF DECUMBENT BUGLE     |
| 6  | BLACKEND SWALLOWWORT ROOT          |
| 7  | CASTOR SEED                        |
| 8  | KUSNEZOFF MONKSHOOD ROOT           |
| 9  | CICADA SLOUGH                      |
| 10 | ROOT OF MEDICIL CYATHULA           |
| 11 | ALL-GRASS OF COMMON ANDROGRPHIS    |
| 12 | HYDNOCARPI ANTHELMINTICAE SEMEN    |
| 13 | ROOT AND RHZIOME OF SORREL RHUBARB |
| 14 | ROOT PILOSE ASIABELL               |
| 15 | FRUIT OF BELVEDERE                 |
| 16 | CHINESE WAXGOURD PEEL              |
| 17 | EUCOMMIA BARK                      |
| 18 | SMALL CENTIPEDA HERB               |
| 19 | SEN LEAF                           |
| 20 | INDIAN BREAD                       |
| 21 | ALL-GRASS OF COMMON DUCKSMEAT      |
| 22 | RUBI FRUCTUS                       |
| 23 | DRIED GINGER                       |
| 24 | FLOWER BUD OF LOBED KUDZUVINE      |

|    |                                       |
|----|---------------------------------------|
| 25 | FRUIT OF AXILLARY CHOEROSPONDIAS      |
| 26 | SAFFLOWER                             |
| 27 | TRIGONELLAE SEMEN                     |
| 28 | STEM OR LEAF OF FUNG WAXPLANT         |
| 29 | SEMINO-DERMIS ARACHIDIS               |
| 30 | FLOWER BUD OF JAPANESE PAGODATREE     |
| 31 | ASIATIC PENNYWORT HERB                |
| 32 | SEED OF GARDEN BALSAM                 |
| 33 | PUNCTUREVINE CALTROP FRUIT            |
| 34 | TINOSPORAE RADIX                      |
| 35 | CHRISTI LOOSESTRIFE                   |
| 36 | KELP OR TANGLE                        |
| 37 | ALL - GRASS OF COMMON HERON'S BILL    |
| 38 | LOTUS PLUMULE                         |
| 39 | GENTIAE RADIX ET RHOZIMA              |
| 40 | UNIFLOWER SWISSCENTAURY ROOT          |
| 41 | DAHURIAN RHODODENDRON LEAF            |
| 42 | INDIAN TRUMPETFLOWER SEED             |
| 43 | FLOWER OF COMMON BOMBAX               |
| 44 | AKEBIA, CLEMATIS STEM                 |
| 45 | CAULIS SINOMENII                      |
| 46 | CARII FRUCTUS                         |
| 47 | GINSENG                               |
| 48 | MULBERRY LEAF                         |
| 49 | GRASSLEAF SWEETFLAG RHIZOME           |
| 50 | SALVIAE CHINENSIS HERBA               |
| 51 | GPHALII AFFINIS HERBA                 |
| 52 | COMBINED SPICEBUSH ROOT               |
| 53 | ALL-GRASS MANCHURIAN WILDGINGER       |
| 54 | STACHYURUS OR JAPANESE HELWINGIA PITH |
| 55 | SOLIDAGINIS HERBA                     |
| 56 | EMBLIC LEAFFLOWER FRUIT               |
| 57 | FRUIT OF CAPE JASMINE                 |
| 58 | ARNEBIA ROOT GROMWELL ROOT            |

**Supplementary figure-1:** Enrichment network using SymMap database showed 58 medicinal plants had a a major role in suppressing Amyotrophic Lateral Sclerosis or its disease related symptoms.
