# Supplementary material
Source: PubMed Central journal article supplement (PMC9622974)
Supplement: 13205_2022_3401_MOESM2_ESM.pdf [file 13205_2022_3401_MOESM2_ESM.pdf]

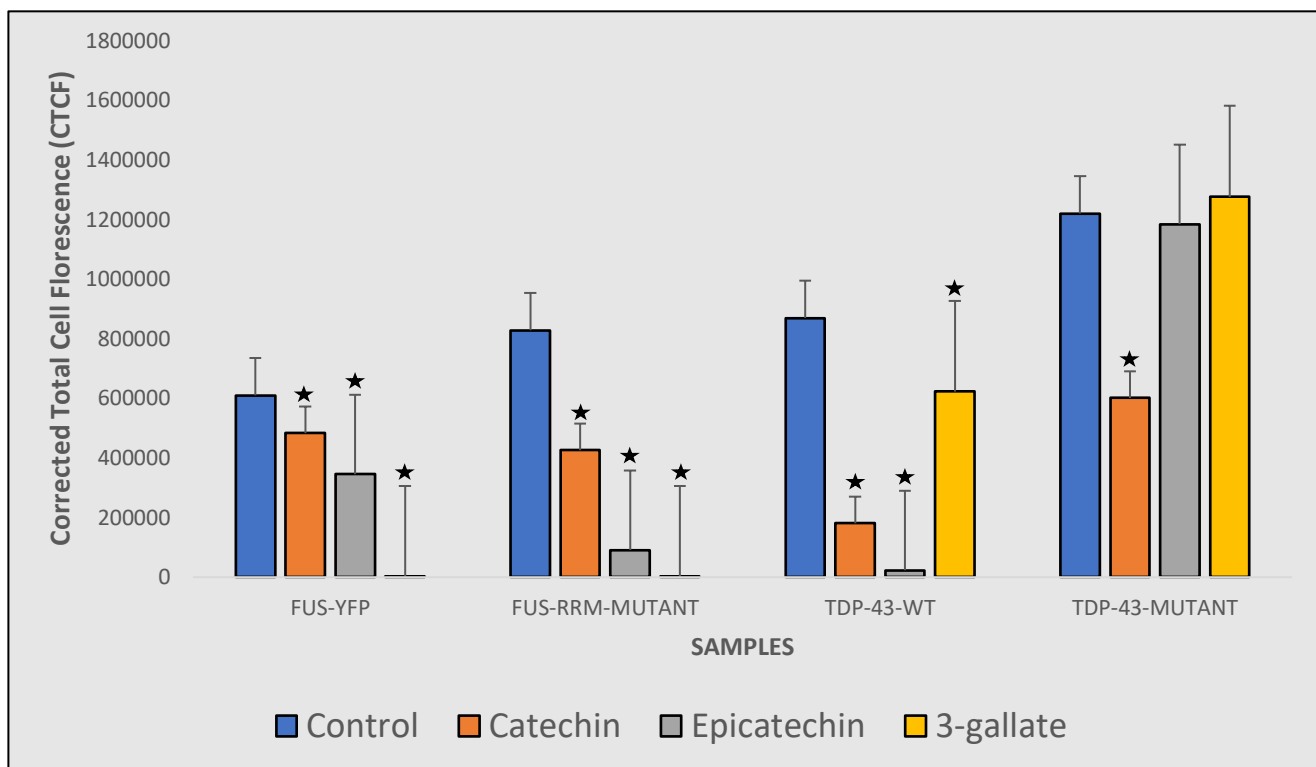

**Supplementary figure-2A:** Results obtained from fluorescence quantification of FUS and TDP-43 transformed yeast cells treated with different catechin derivatives (CTCF-Corrected Total Cell Fluorescence). ★ Represents  $P \leq 0.05$ .

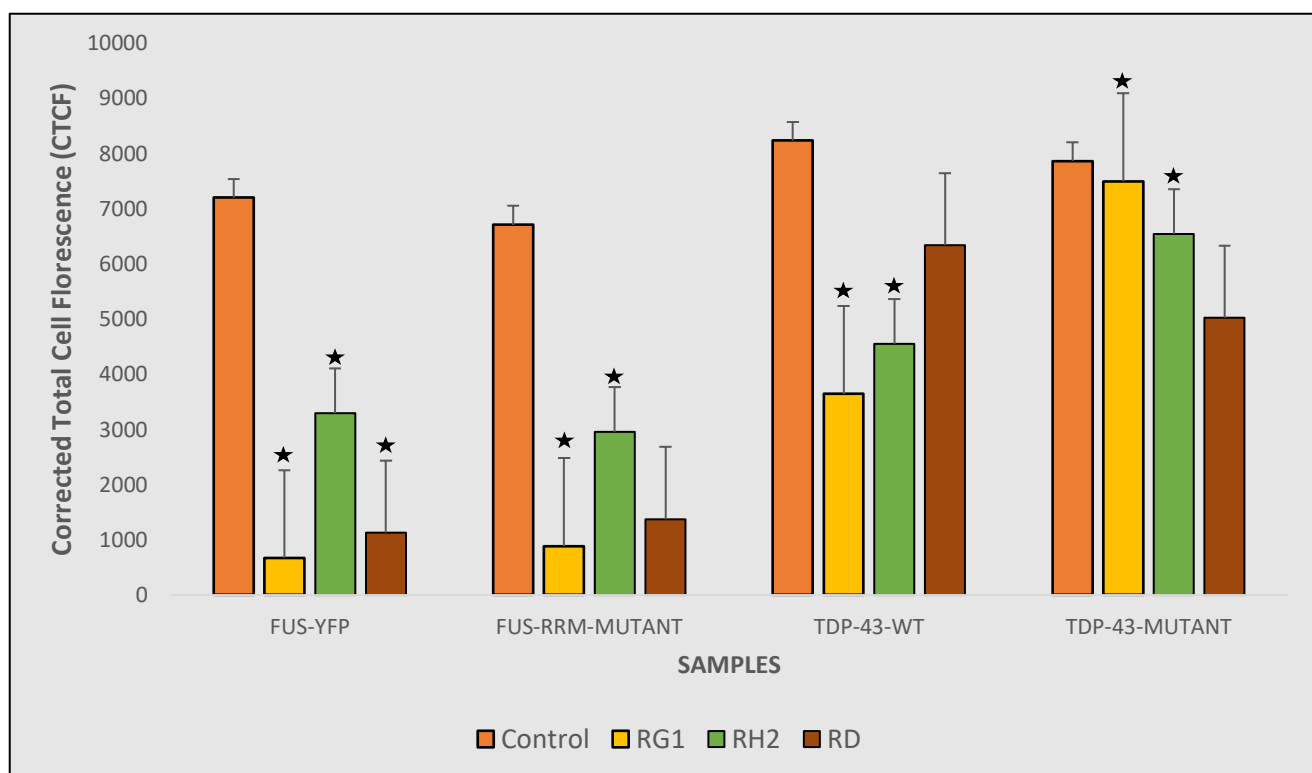

**Supplementary figure-2B:** Results obtained from fluorescence quantification of FUS and TDP-43 transformed yeast cells treated with different Ginsenosides (CTCF-Corrected Total Cell Fluorescence). ★ Represents  $P \leq 0.05$ .
