# Supplementary material
Source: PubMed Central journal article supplement (PMC9622974)
Supplement: 13205_2022_3401_MOESM3_ESM.pdf [file 13205_2022_3401_MOESM3_ESM.pdf]

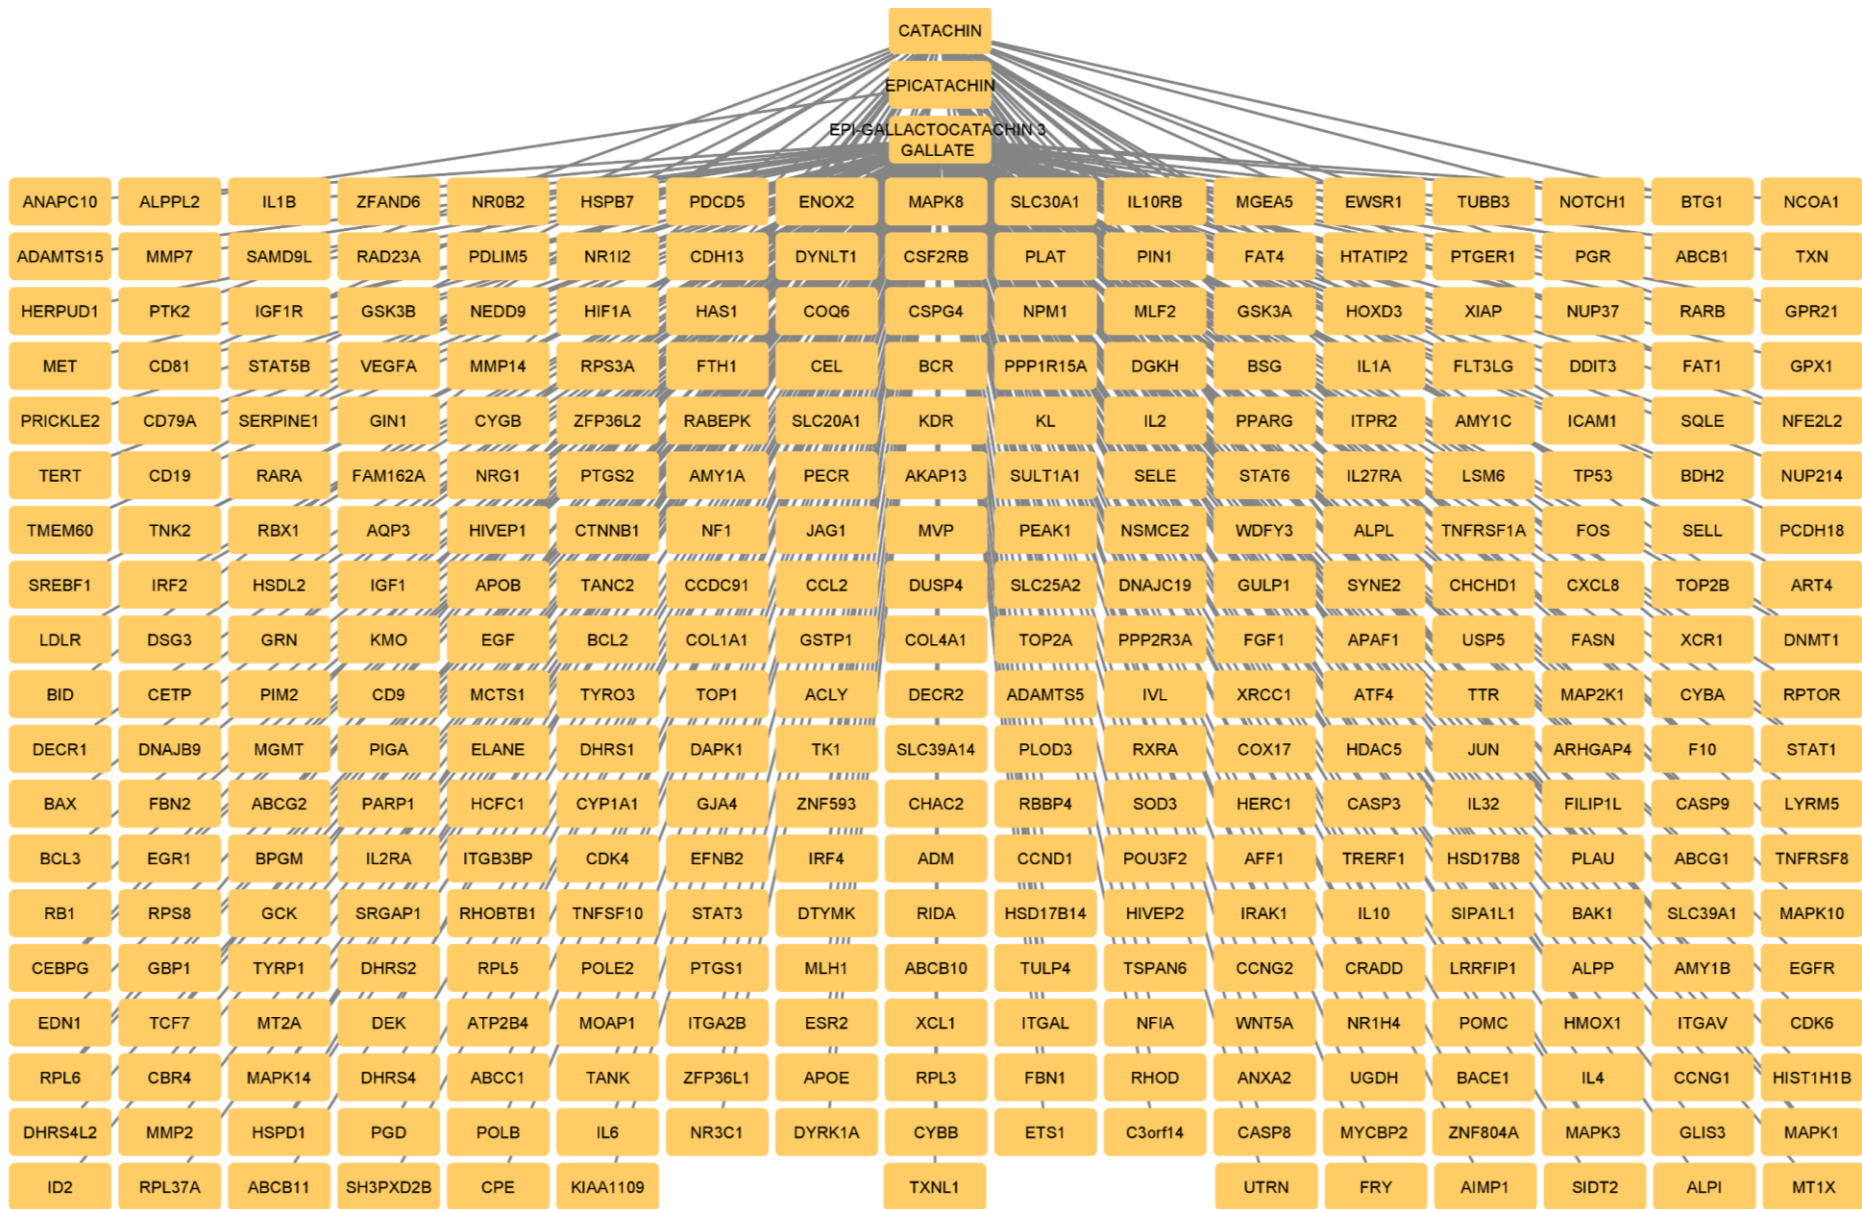

**Supplementary figure 3A:** Integrated network containing interacting proteins between catechin, epicatechin and Epi-gallactocatechin-3-gallate.

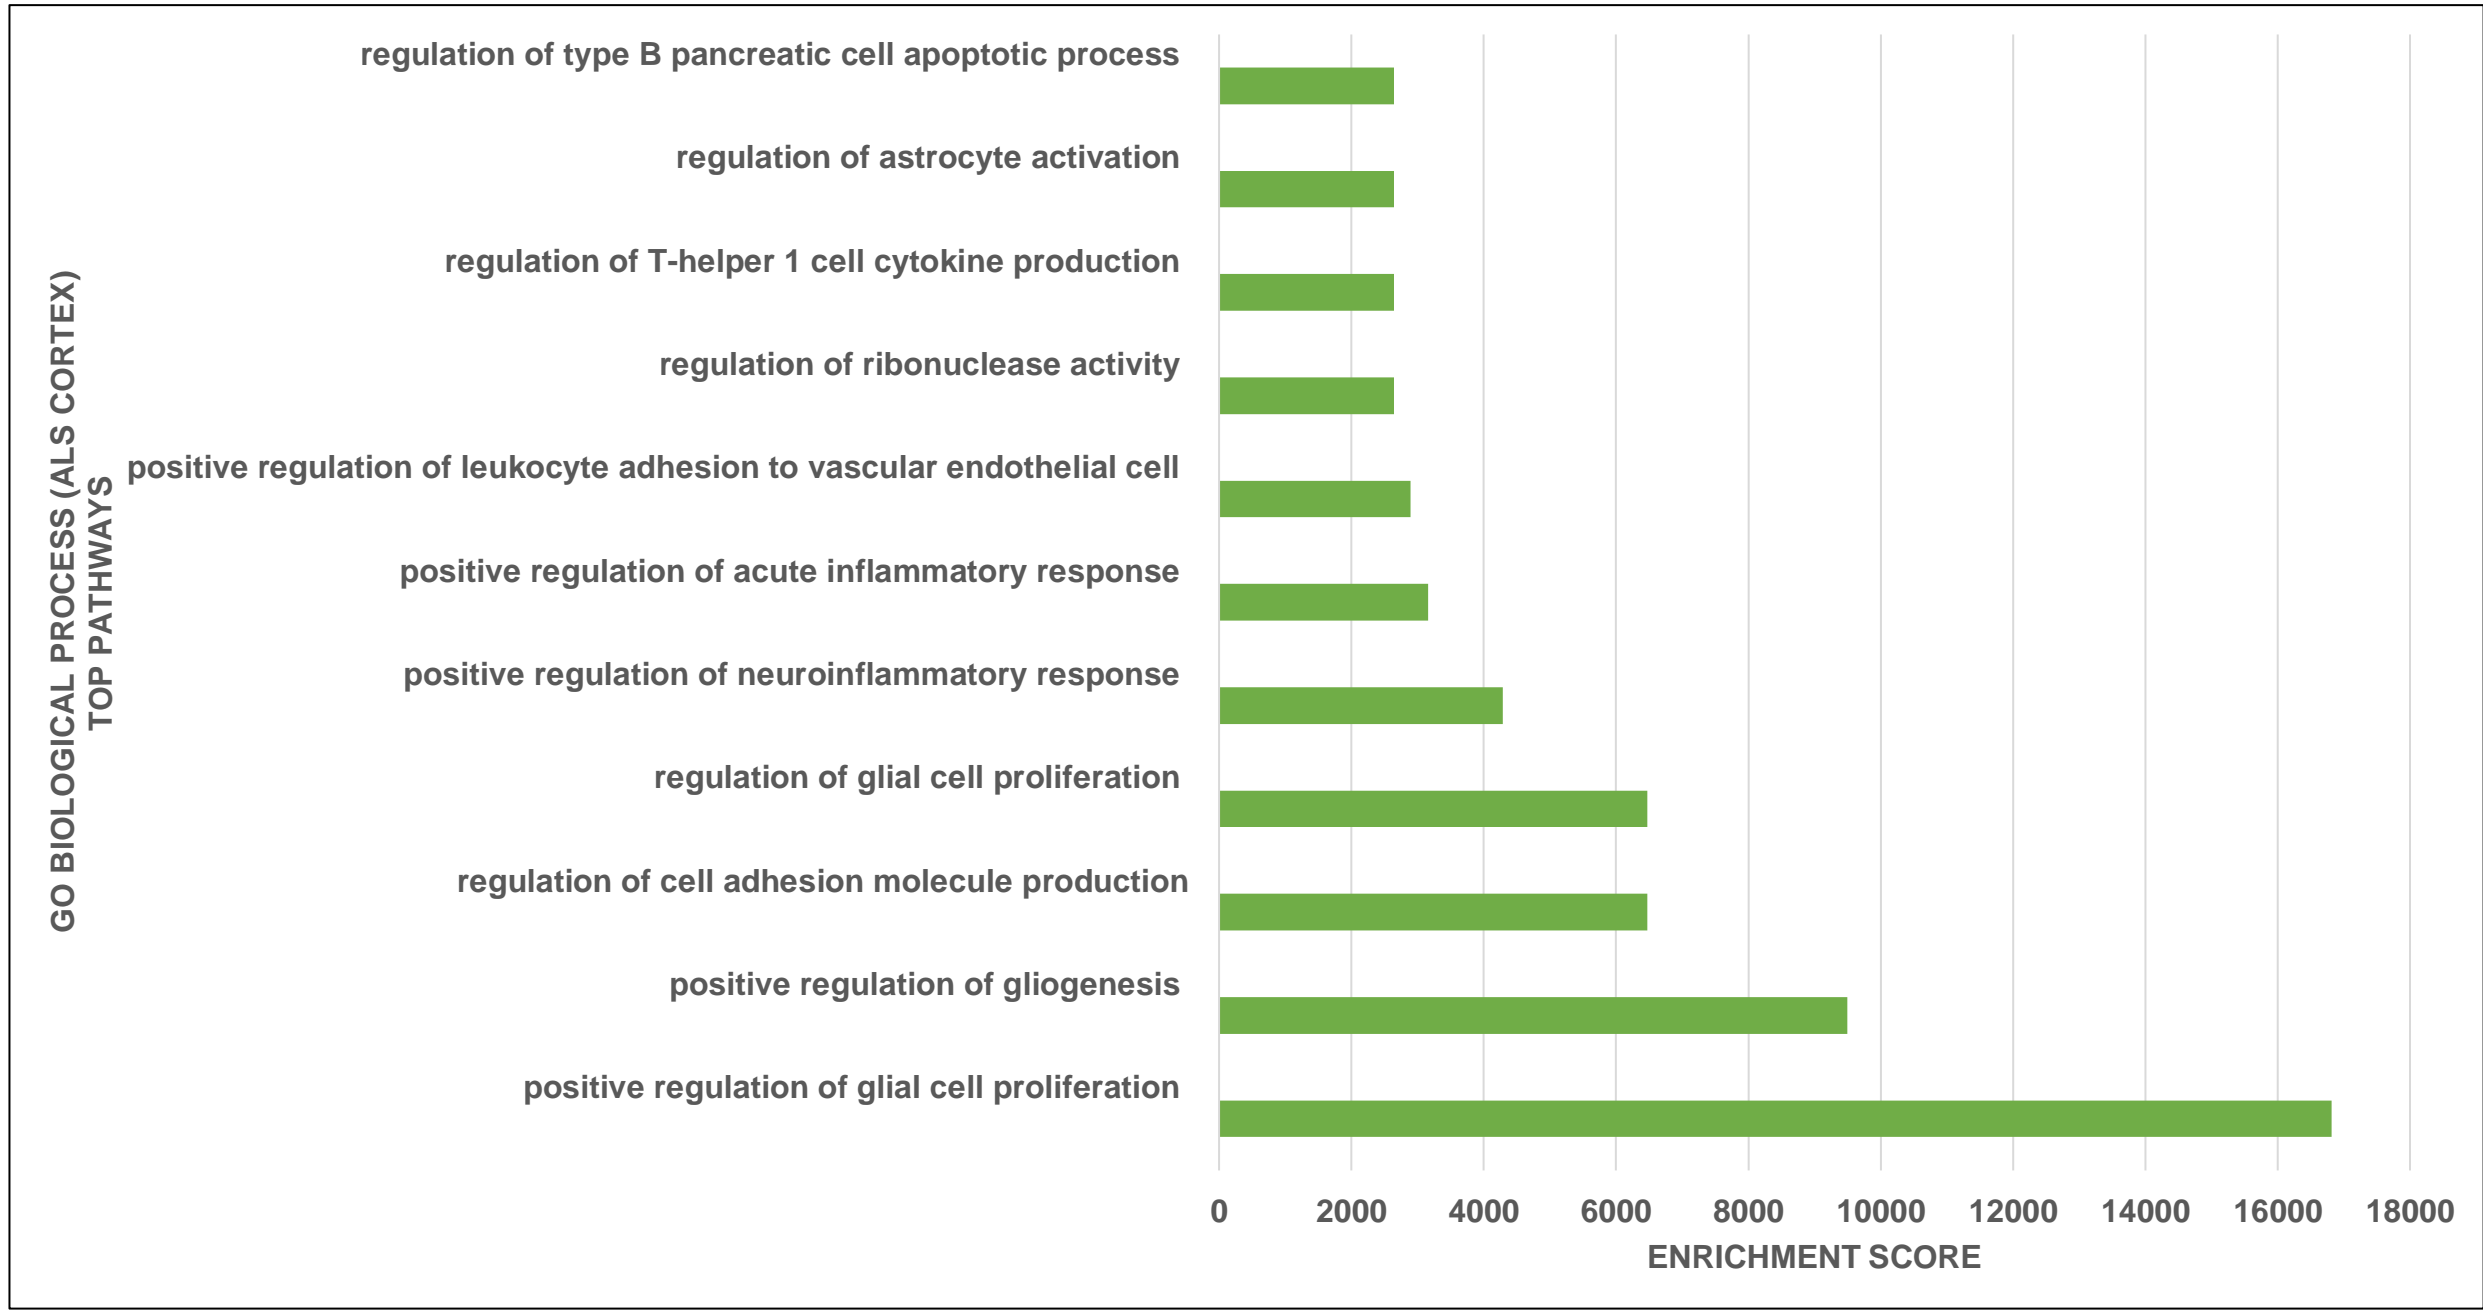

Supplementary figure 3B: Bar graph representing significant pathways obtained from enrichment analysis of common genes obtained between ALS patient's cerebral cortex and interacting genes of Catechin derivatives.

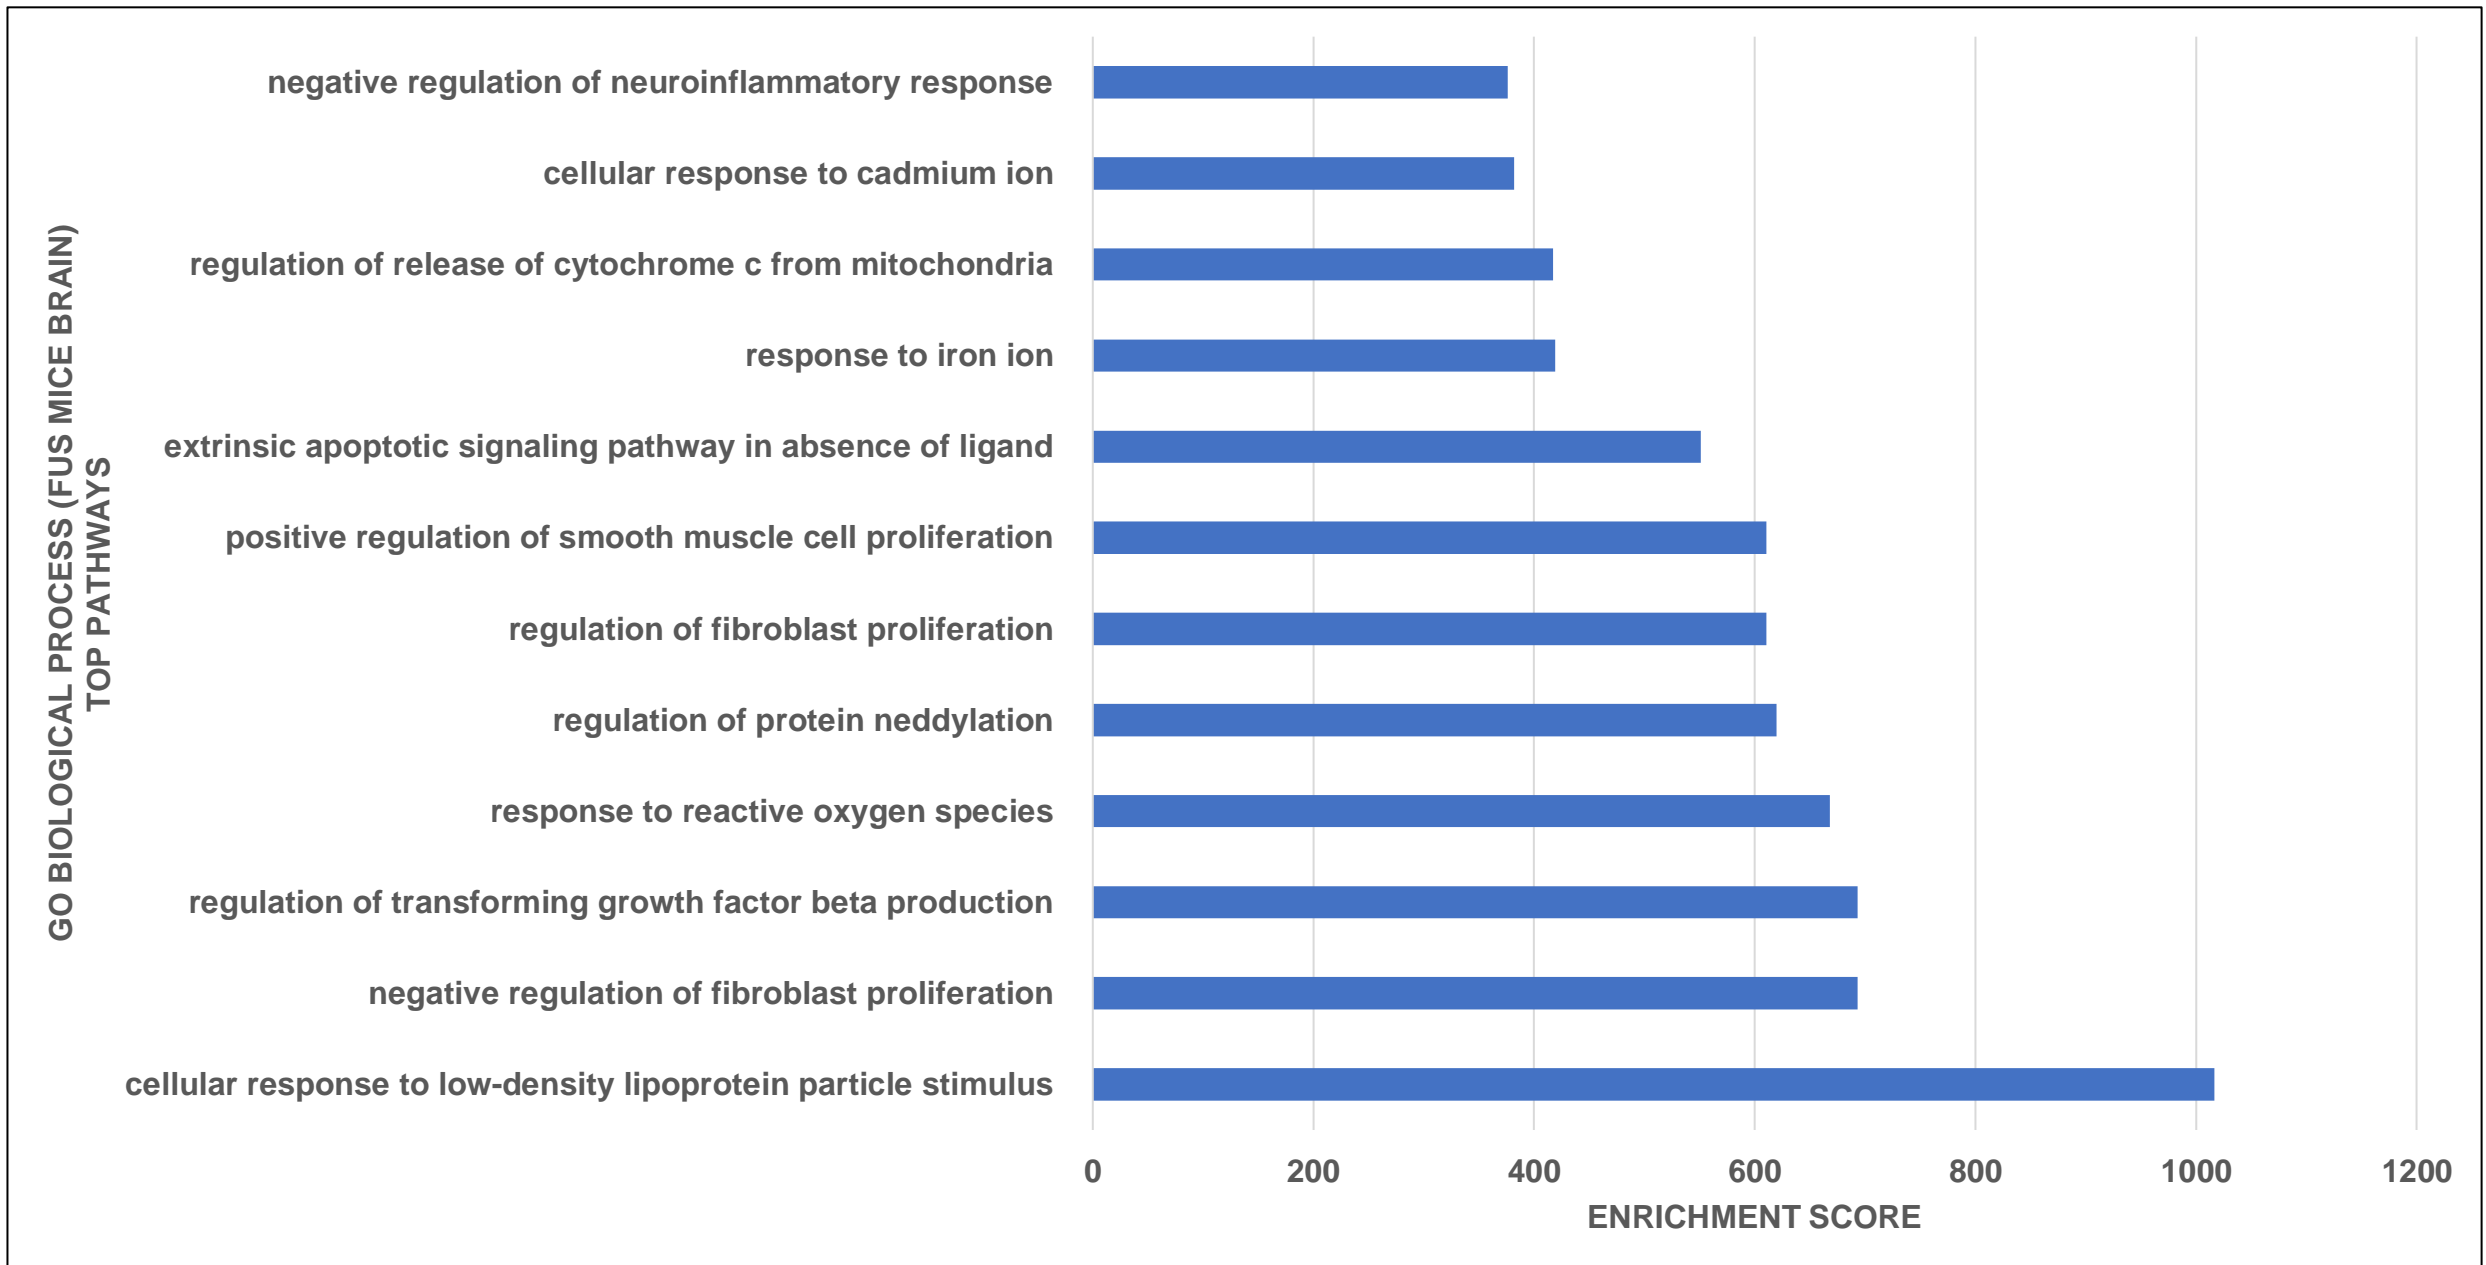

Supplementary figure 3C: Bar graph representing significant pathways obtained from enrichment analysis of common genes obtained between FUS mice brain and interacting genes of Catechin derivatives.

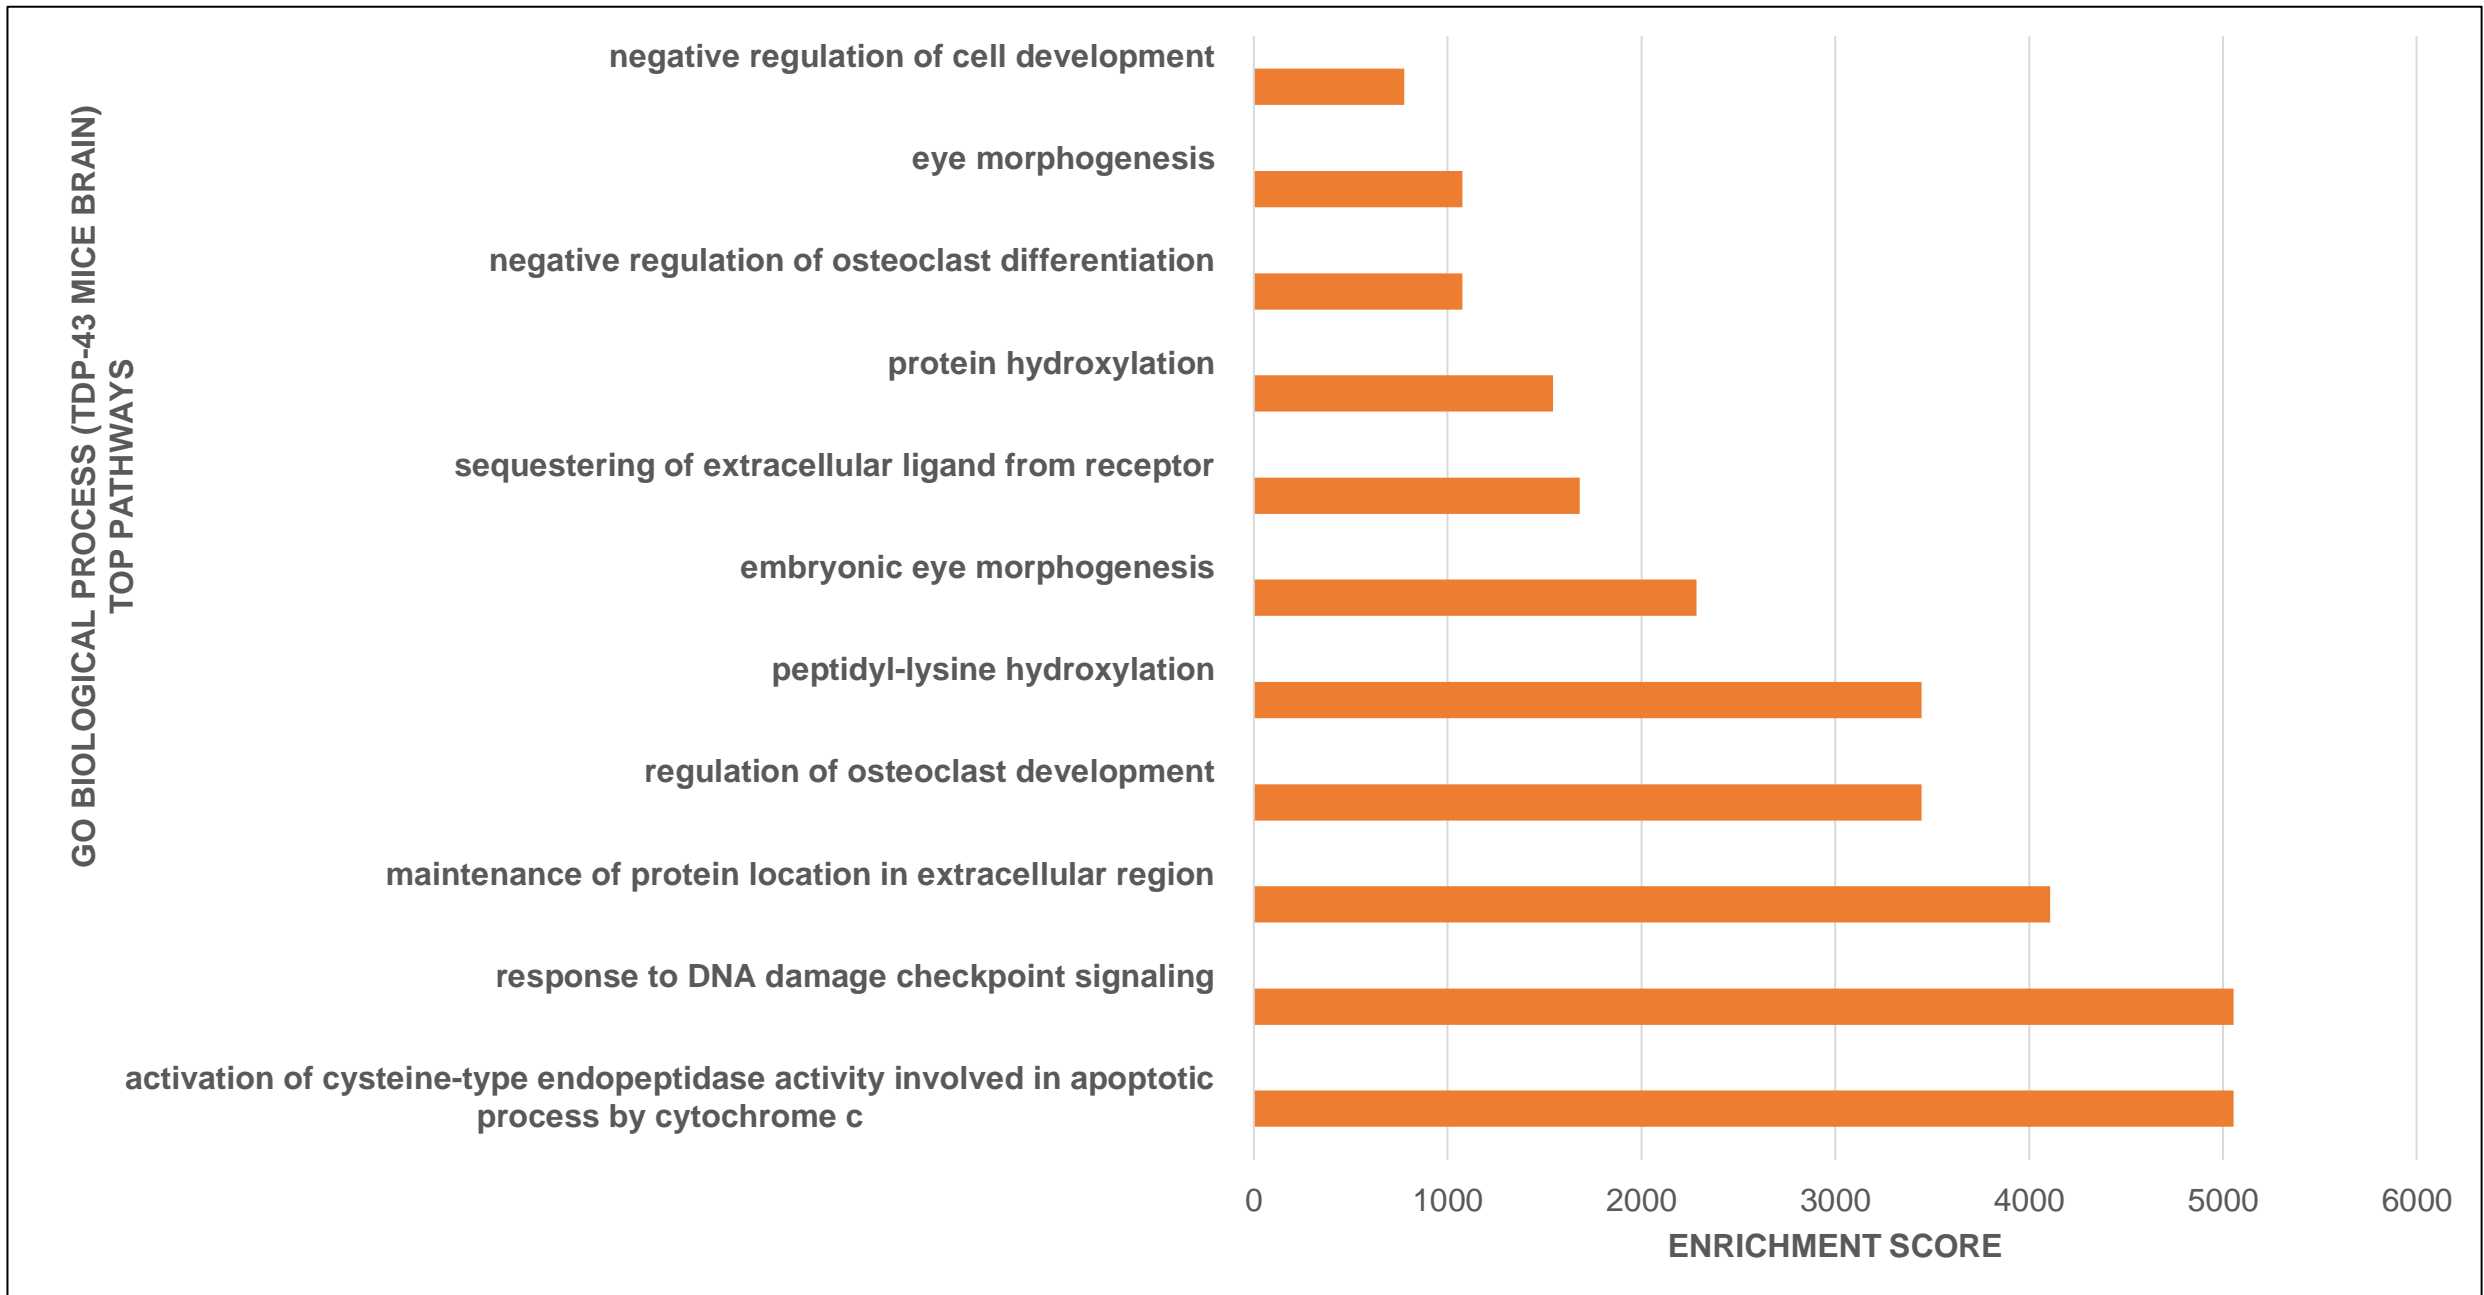

Supplementary figure 3D: Bar graph representing significant pathways obtained from enrichment analysis of common genes obtained between TDP-43 mice brain and interacting genes of Catechin derivatives.
